# Supplementary material
Source: Research Square preprint supplement (doi:10.21203/rs.3.rs-9688546/v1)
Supplement: Supplementary file 1 [file 08b073f75cae918b2eb2074a.docx]

Supplementary Information for
Texture Similarity Network Uncover Schizophrenia Subtypes with Unique Molecular Signatures

catalogue

**Supplementary Figure S1**2

**Supplementary Figure S2**3

#
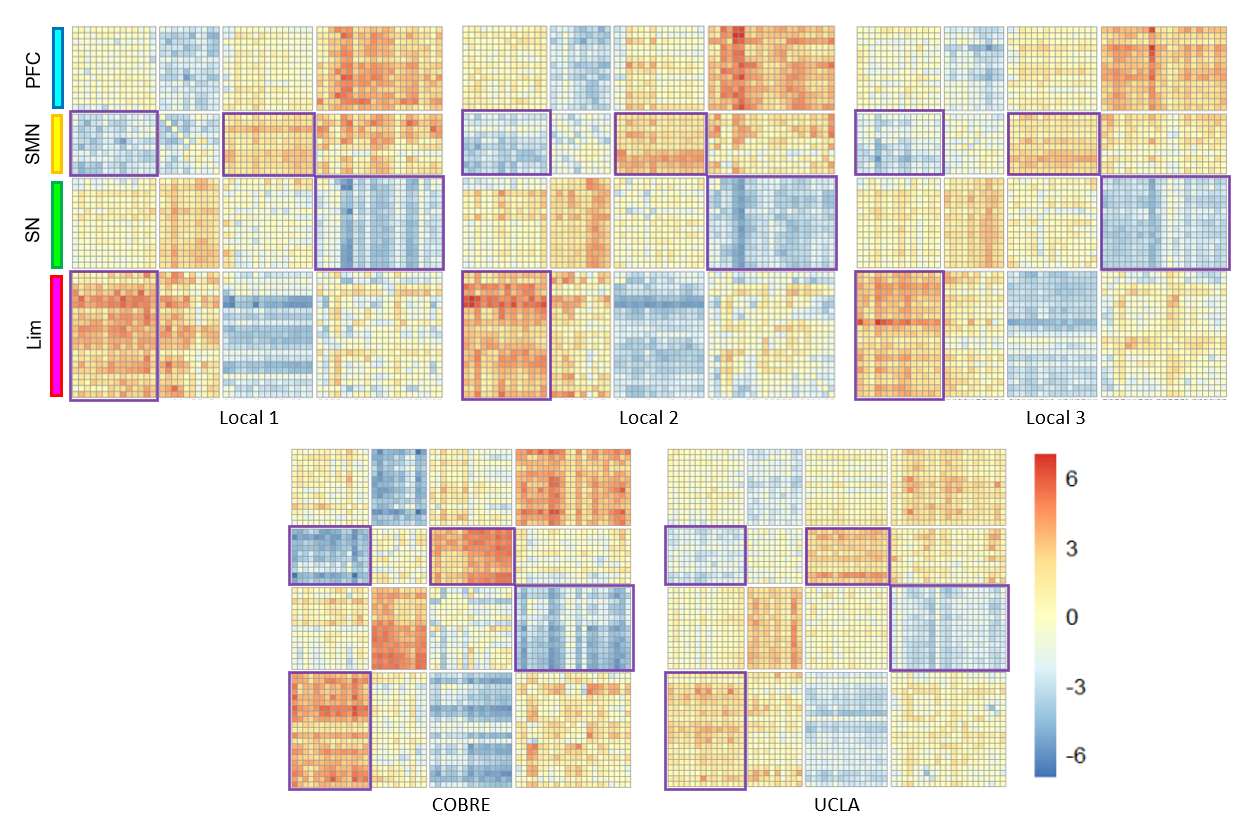
eFigure S2: T-map of the differences in the two subtypes of TSN across 5 sites. Heat maps show TSN dysconnectivities of the top 60 brain regions in five sites across subtypes. Consistent inter-regional connectivity patterns and four prominent modules are observed across centers. Abbreviations: Lim, paralimbic system; PFC, prefrontal cortex; SMN, sensorimotor network; SN, subcortical nucleus; TSN, texture similarity network.


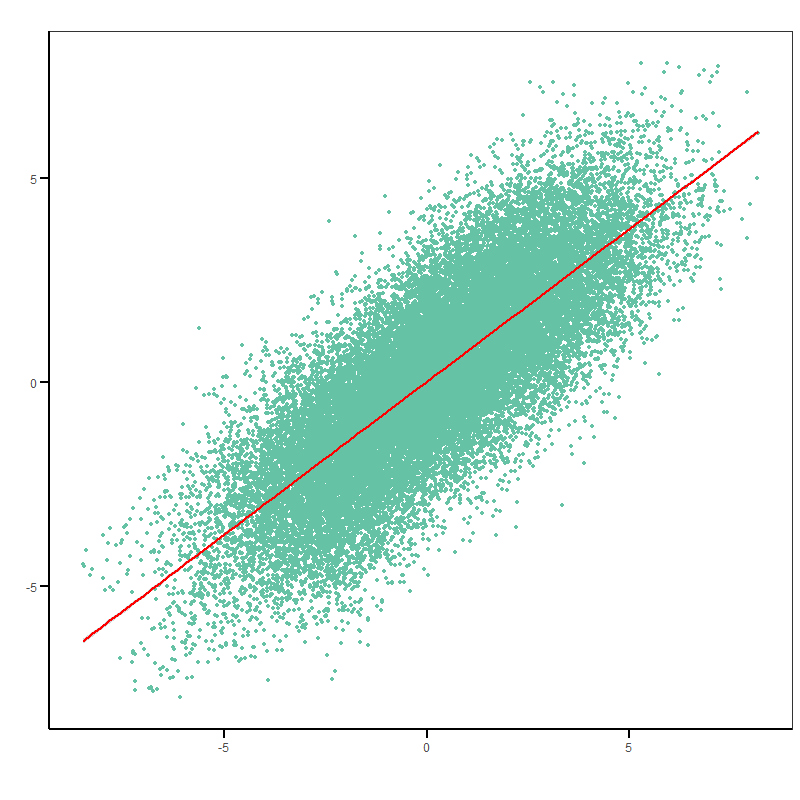

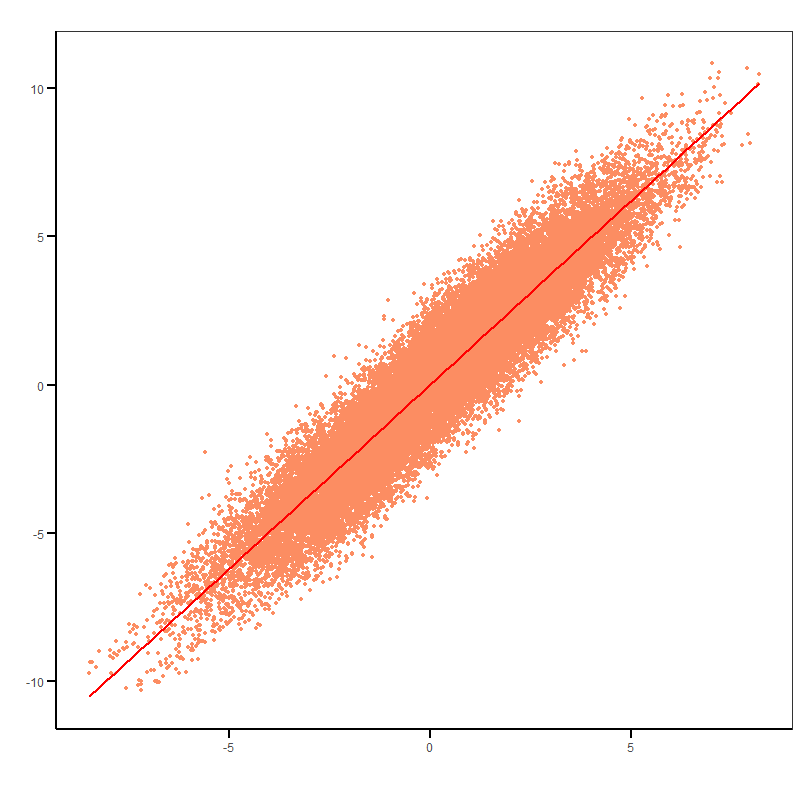

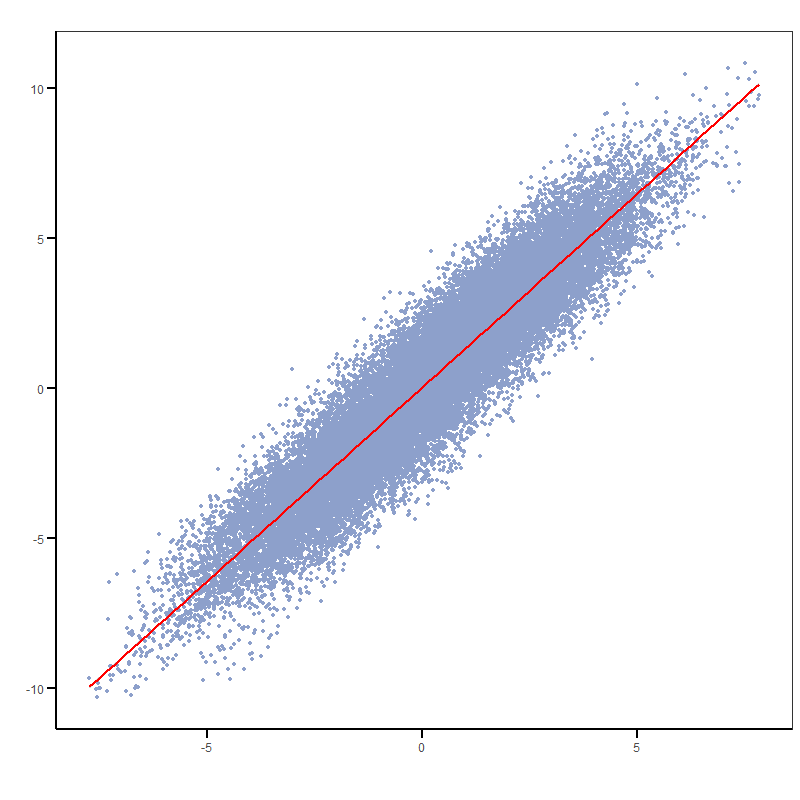

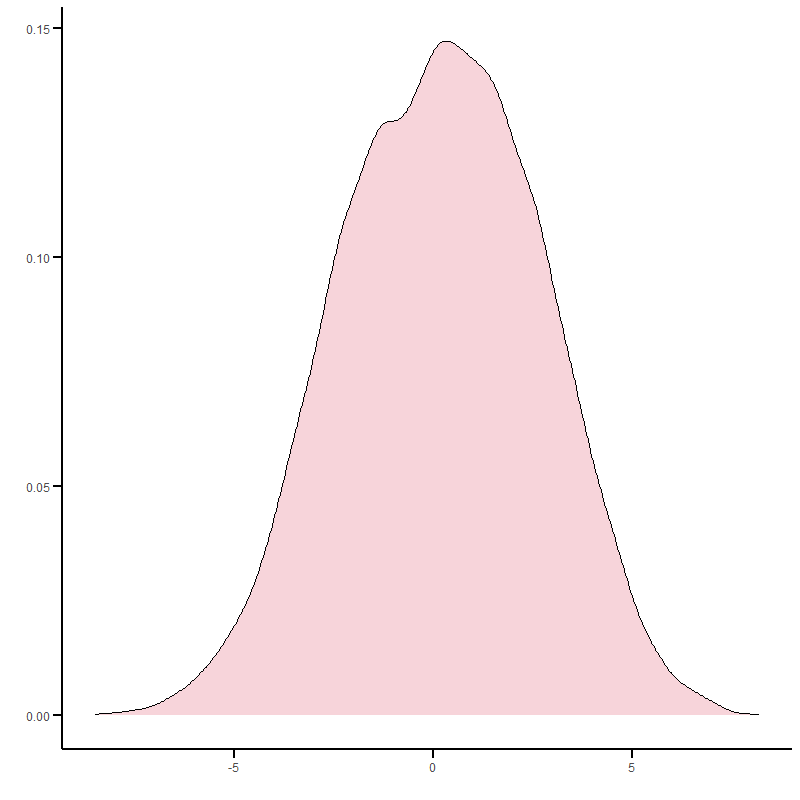

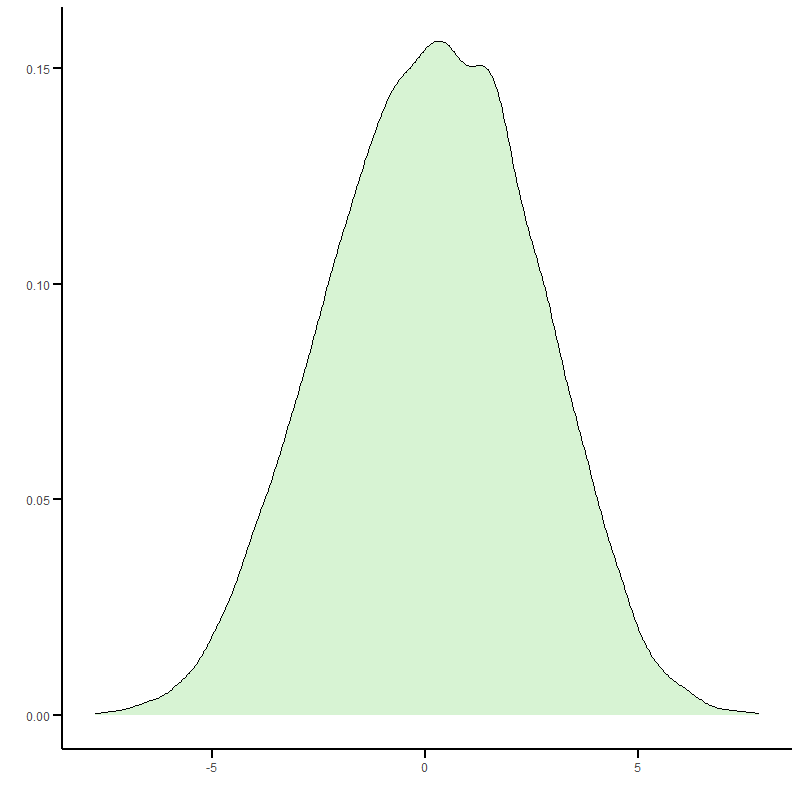

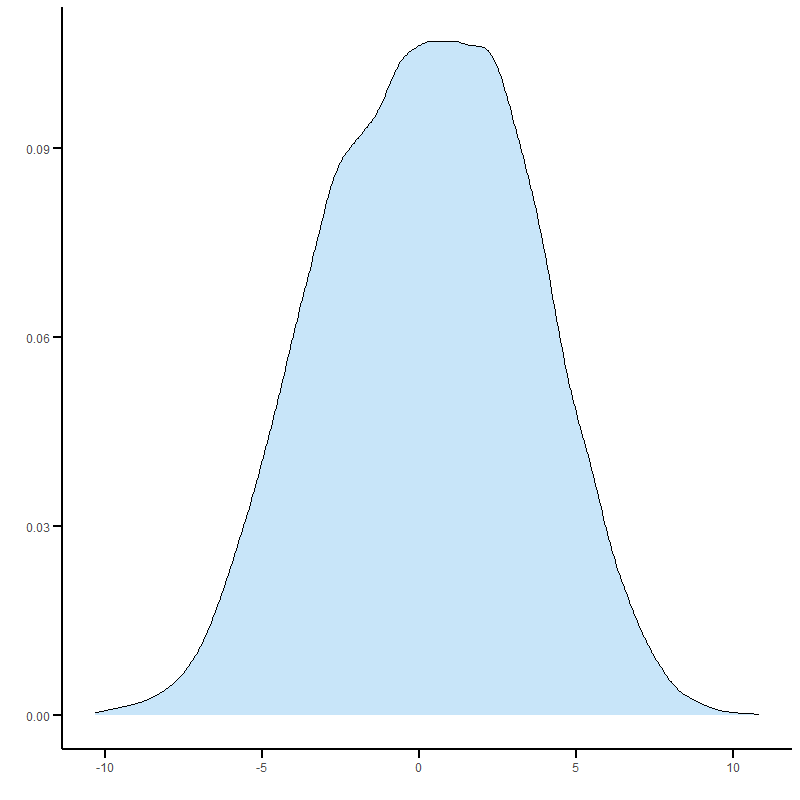


0.9434

0.7897

0.9355

Total

Split1

Split2

# eFigure S3: Correlation of subtypes TSN patterns obtained from the training in the split-sample experiment. Inter-subtype differences were consistent across splits (Pearson r = 0.79–0.94).
