# Supplementary material
Source: Research Square preprint supplement (doi:10.21203/rs.3.rs-9688546/v1)
Supplement: Supplementary file 2 [file 59feee9a470bbd2446ba793a.xlsx]

## Sheet: index
Table	Contents
eTable S1	ARI*CH value of optimum parameters for the K-means clustering
eTable S2	ARI value of optimum parameters for the K-means clustering
eTable S3	CH value of optimum parameters for the K-means clustering
eTable S4	demographic comparison in all patients clustering
eTable S5	demographic comparison in split-sample validation
eTable S6	demographic comparison in leave-one-site-out validation
eTable S7	PNASS score disparities between subtypes
eTable S8	SANS/SAPS score disparities between subtypes
eTable S9	CPZ disparities between subtypes
eTable S10	radiomics feature list
eTable S11	CH value of Hierarchical clustering for screening the best ROI
eTable S12	list of brain region used in K-means clustering(BNA subregions)
eTable S13	course disparities between subtypes in Site2 (First-Episode and chronic)
eTable S14	Association between TSN disruption and schizophrenia risk gene expression at FEW-corrected Pc < 0.5
eTable S15	Differential TSN disruption-expression correlations between the two subtypes identified by Williams modified t-test at FEW-corrected Pc < 0.5
eTable S16	Enrichment for 173 risk genes significantly differential correlations between the two subtypes
eTable S17	Association between TSN disruption and neurotransmitter receptor density level at FEW-corrected Pc < 0.5
eTable S18	Differential TSN disruption-density correlations between the two subtypes identified by Williams modified t-test at FEW-corrected Pc < 0.5
eTable S19	Scanning information for structural MRI in each schizophrenia dataset

## Sheet: eTable S1
eTable S1. ARI*CH value of optimum parameters for the K-means clustering
Subtype	Sqeuclidean×Cluster	Correlation×Cluster	Cityblock×Cluster	Cosine×Cluster	Sqeuclidean×Uniform	Correlation×Uniform	Cityblock×Uniform	Cosine×Uniform	Sqeuclidean×Plus	Correlation×Plus	Cityblock×Plus	Cosine×Plus
K=2	6.1373	8.4813	0.4751	8.4479	6.5441	8.5107	1.057	8.4588	6.5541	8.5237	0.8318	8.3546
K=3	5.4811	5.6436	0.205	5.6562	5.8338	5.7762	0.2214	5.8827	5.9889	5.5843	0.2784	5.7523
K=4	4.594	4.1837	0.0918	4.17	4.9584	4.1382	0.1111	4.155	5.0714	4.0992	0.1737	4.13
K=5	2.3124	2.5984	0.0829	2.5477	2.5634	2.4284	0.0847	2.4555	2.5292	2.577	0.1292	2.5222
K=6	1.731	1.8646	0.066	1.8384	1.8846	1.7716	0.0621	1.8032	1.8565	1.8298	0.1034	1.8675
K=7	1.4576	1.4554	0.0543	1.4463	1.4366	1.404	0.0496	1.4228	1.3811	1.4577	0.0844	1.4685
K=8	1.257	1.2078	0.0623	1.2467	1.1773	1.1614	0.043	1.1955	1.1661	1.2019	0.0743	1.2156
K=9	1.0583	1.0343	0.0571	1.0723	1.024	0.9838	0.0412	0.9954	1.0239	1.0356	0.0635	1.0637
K=10	0.9251	0.9301	0.0448	0.9274	0.9188	0.8151	0.0431	0.8101	0.8846	0.9239	0.058	0.8968

## Sheet: eTable S2
eTable S2. ARI value of optimum parameters for the K-means clustering
Subtype	Sqeuclidean×Cluster	Correlation×Cluster	Cityblock×Cluster	Cosine×Cluster	Sqeuclidean×Uniform	Correlation×Uniform	Cityblock×Uniform	Cosine×Uniform	Sqeuclidean×Plus	Correlation×Plus	Cityblock×Plus	Cosine×Plus
K=2	0.5992	0.8432	0.0904	0.84	0.6388	0.846	0.1715	0.8403	0.6401	0.8473	0.1396	0.83
K=3	0.6289	0.6613	0.0611	0.6628	0.6664	0.6761	0.0534	0.6889	0.6849	0.6548	0.0654	0.6743
K=4	0.5953	0.5667	0.0354	0.5648	0.6387	0.5606	0.0343	0.5627	0.6528	0.5555	0.0525	0.5591
K=5	0.3566	0.4037	0.0359	0.3957	0.38	0.3777	0.0302	0.3818	0.375	0.3997	0.0453	0.3921
K=6	0.3071	0.3249	0.0318	0.3204	0.3133	0.3097	0.0246	0.3138	0.3098	0.3183	0.0407	0.3246
K=7	0.2918	0.2799	0.0283	0.2777	0.2643	0.2697	0.0213	0.2733	0.2557	0.2795	0.0358	0.2817
K=8	0.2761	0.2528	0.034	0.2602	0.2367	0.2439	0.0195	0.2504	0.2357	0.2508	0.0344	0.254
K=9	0.2542	0.2334	0.0329	0.2415	0.2219	0.2224	0.0194	0.2248	0.2237	0.2332	0.0312	0.2394
K=10	0.2405	0.2243	0.0265	0.2236	0.2121	0.1982	0.021	0.1966	0.2071	0.2225	0.0294	0.2159

## Sheet: eTable S3
eTable S3. CH value of optimum parameters for the K-means clustering
Subtype	Sqeuclidean×Cluster	Correlation×Cluster	Cityblock×Cluster	Cosine×Cluster	Sqeuclidean×Uniform	Correlation×Uniform	Cityblock×Uniform	Cosine×Uniform	Sqeuclidean×Plus	Correlation×Plus	Cityblock×Plus	Cosine×Plus
K=2	0.5992	0.8432	0.0904	0.84	0.6388	0.846	0.1715	0.8403	0.6401	0.8473	0.1396	0.83
K=3	0.6289	0.6613	0.0611	0.6628	0.6664	0.6761	0.0534	0.6889	0.6849	0.6548	0.0654	0.6743
K=4	0.5953	0.5667	0.0354	0.5648	0.6387	0.5606	0.0343	0.5627	0.6528	0.5555	0.0525	0.5591
K=5	0.3566	0.4037	0.0359	0.3957	0.38	0.3777	0.0302	0.3818	0.375	0.3997	0.0453	0.3921
K=6	0.3071	0.3249	0.0318	0.3204	0.3133	0.3097	0.0246	0.3138	0.3098	0.3183	0.0407	0.3246
K=7	0.2918	0.2799	0.0283	0.2777	0.2643	0.2697	0.0213	0.2733	0.2557	0.2795	0.0358	0.2817
K=8	0.2761	0.2528	0.034	0.2602	0.2367	0.2439	0.0195	0.2504	0.2357	0.2508	0.0344	0.254
K=9	0.2542	0.2334	0.0329	0.2415	0.2219	0.2224	0.0194	0.2248	0.2237	0.2332	0.0312	0.2394
K=10	0.2405	0.2243	0.0265	0.2236	0.2121	0.1982	0.021	0.1966	0.2071	0.2225	0.0294	0.2159

## Sheet: eTable S4
eTable S4. demographic comparison in all patients clustering
Site	Subtype1				Subtype2				Age Rank-sum test		Sex Chi-square test
	Number (%)	Mean age (SD)	Median age (IQR)	Male number (%)	Number (%)	Mean age (SD)	Median age (IQR)	Male number (%)	Z	P-value	x^2	P-value
Total	260(59.5%)	32.1(11.6)	31.0(17.3)	156(60.0%)	177(40.5%)	32.9(10.2)	31.0(17.0)	107(60.5%)	-0.894	0.371	0.009	0.925
Site1(Tianjin)	68(59.1%)	34.3(10.5)	32.0(12.5)	34(50.0%)	47(40.9%)	33.6(9.0)	33.0(12.0)	24(51.1%)	-0.165	0.869	0.013	0.911
Site2(Tianjin)	59(54.6%)	35.1(8.6)	35.0(13.5)	33(55.9%)	49(45.4%)	32.3(9.3)	31.0(16.0)	26(53.1%)	-1.742	0.082	0.089	0.765
Site3(Tianjin)	62(73.8%)	21.1(7.5)	19.0(9.0)	33(53.2%)	22(26.2%)	23.7(7.9)	22.0(13.8)	11(50.0%)	-1.514	0.13	0.068	0.795
Site4(COBRE)	44(55.0%)	37.4(13.1)	35.5(25.3)	35(79.5%)	36(45.0%)	35.9(11.8)	35.5(20.8)	29(80.6%)	-0.61	0.542	0.013	0.911
Site5(UCLA)	27(54.0%)	36.4(8.7)	38.0(14.0)	21(77.8%)	23(46.0%)	36.6(9.2)	37.0(16.5)	17(73.9%)	-0.039	0.969	0.102	0.75

## Sheet: eTable S5
eTable S5. demographic comparison in split-sample validation
Split	Subtype1				Subtype2				Age Rank-sum test		Sex Chi-square test
	Number (%)	Mean age (SD)	Median age (IQR)	Male number (%)	Number (%)	Mean age (SD)	Median age (IQR)	Male number (%)	Z	P-value	x^2	P-value
Split1	129(58.9%)	33.4(11.9)	31.0(19.0)	73(56.6%)	90(41.1%)	33.1(9.7)	32.0(17.0)	51(56.7%)	-0.081	0.935	0.00013	0.991
Split2	124(56.9%)	31.4(11.3)	32.0(17.3)	80(64.5%)	94(43.1%)	31.6(10.5)	30.0(16.8)	59(62.8%)	-0.156	0.876	0.071	0.79

## Sheet: eTable S6
eTable S6. demographic comparison in leave-one-site-out validation
Site	Subtype1				Subtype2				Age Rank-sum test		Sex Chi-square test
	Number (%)	Mean age (SD)	Median age (IQR)	Male number (%)	Number (%)	Mean age (SD)	Median age (IQR)	Male number (%)	Z	P-value	x^2	P-value
Site1(Tianjin)	71(59.1%)	34.3(10.2)	32.0(12.0)	34(47.9%)	44(40.9%)	33.5(9.3)	32.5(13.3)	24(51.1%)	-0.297	0.767	0.482	0.488
Site2(Tianjin)	62(54.6%)	34.9(8.6)	35.0(13.8)	35(56.5%)	46(45.4%)	32.3(9.4)	31.0(15.5)	24(52.2%)	-1.679	0.093	0.195	0.659
Site3(Tianjin)	60(73.8%)	21.2(7.5)	19.0(9.0)	32(53.3%)	24(26.2%)	23.2(7.8)	21.0(13.5)	12(50.0%)	-1.215	0.224	0.076	0.782
Site4(COBRE)	45(55.0%)	36.7(13.1)	35.0(25.0)	35(77.8%)	35(45.0%)	36.8(11.9)	37.0(21.5)	29(82.9%)	-0.039	0.969	0.317	0.573
Site5(UCLA)	29(54.0%)	36.3(9.1)	38.0(14.0)	23(79.3%)	21(46.0%)	36.7(8.8)	37.0(17.0)	15(71.4%)	-0.079	0.937	0.415	0.52

## Sheet: eTable S7
eTable S7. PNASS score disparities between subtypes
Clinical	Mean (SD)	Median (IQR)	Z	P-value
PANSS_PT	16.4(6.4)	16.0(10.0)	-0.17	0.86
PANSS_NT	16.7(7.6)	15.0(10.0)	-0.07	0.99
PANSS_GT	32.5(9.5)	31.0(12.0)	-0.36	0.72
PANSS_TT	65.6(18.7)	63.0(24.0)	-0.14	0.88

## Sheet: eTable S8
eTable S8. SANS and SAPS score disparities between subtypes
Clinical	Mean (SD)	Median (IQR)	Z	P-value
SANS_TT	68.2(25.6)	68.5(36.5)	-0.55	0.58
SAPS_TT	56.7(19.0)	52.0(27.0)	-0.73	0.45
SANS_Emotional Blunting	20.3(8.5)	20.0(13.0)	-0.7	0.48
SANS_Alogia	11.8(6.5)	10.0(12.0)	-0.63	0.52
SANS_Avolition-apathy	5.5(2.8)	5.0(4.0)	-1.21	0.22
SANS_Asociality	8.0(3.3)	7.0(4.0)	-1.16	0.24
SANS_Attention Impairment	9.0(3.9)	9.0(6.0)	-0.35	0.73
SAPS_Hallucinations	12.1(7.0)	7.0(9.0)	-0.6	0.55
SAPS_Delusions	20.7(8.2)	18.5(12.5)	-1.57	0.12
SAPS-Bizarre Behavior	8.8(4.3)	8.0(6.0)	-0.89	0.38
SAPS-Disorganized Thinking	15.1(6.1)	13.5(9.0)	-0.28	0.78

## Sheet: eTable S9
eTable S9. CPZ disparities between subtypes
Clinical	Mean (SD)	Median (IQR)	Z	P-value
CPZ-eq NICE	405.6(255.2)	400.0(300.0)	-0.57	0.57
CPZ-eq AJP	475.9(329.7)	400.0(300.0)	-0.1	0.92

[truncated: 10 more sheets: eTable S10, eTable S11, eTable S12, eTable S13, eTable S14, eTable S15, eTable S16, eTable S17, eTable S18, eTable S19]
